# Supplementary material for: Macromolecule Translocation across the Intestinal Mucosa of HIV-Infected Patients by Transcytosis and through Apoptotic Leaks
Source: MDPI journal article supplement (doi:10.3390/cells12141887), 2023-07-18
Supplement: s1 [file s1]

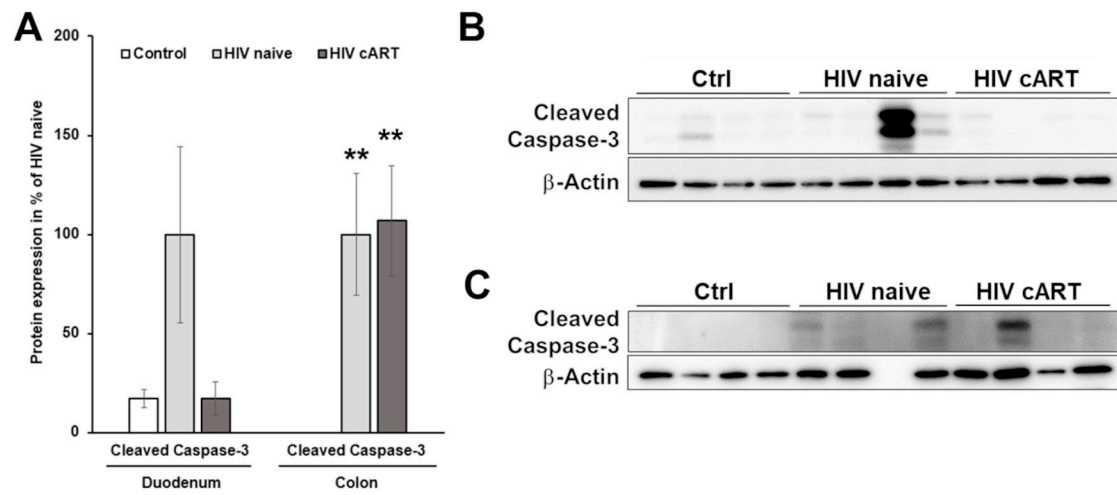

Figure S1: apoptosis in the duodenal and colon mucosa of HIV-infected patients and HIV-negative controls quantified as an expression of cleaved Caspase-3.
